# Supplementary material
Source: PubMed Central journal article supplement (PMC4113908)
Supplement: NIHMS607680-supplement-ESI.pdf [file NIHMS607680-supplement-ESI.pdf]

## Environmentally Responsive Histidine-Carboxylate Zipper Formation between Proteins and Nanoparticles

Rubul Mout, Gulen Yesilbag Tonga, Moumita Ray, Daniel F. Moyano and Vincent M. Rotello\*

### Supporting figures:

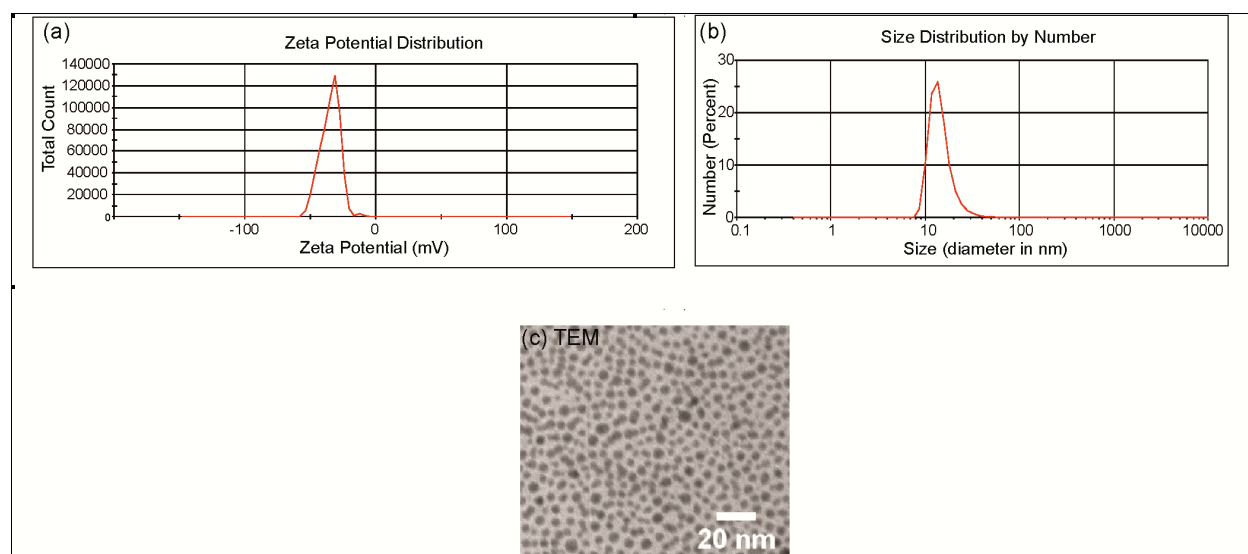

**Fig. S1** Characterization of AuNP-COOH. (a) Zeta potential ( $-34.8 \pm 3.1$  mV, measured at 5 mM PB, pH 7.4), (b) Dynamic light scattering (DLS) diameter ( $14.1 \pm 1.2$  nm, measured at 5 mM PB, pH 7.4), and (c) TEM image of AuNP-COOH.

### EGFP protein sequence<sup>1</sup>:

```
MVSKGEELFTGVVPIVELDGDVNGHKFSVSGEGEGDATYGKLT LKFICTTGKLPVPWPTLVTTFTYGVQCFSRYPDH  
MKQHDFFKSAMPEGYVQERTIFFKDDGNYKTRAEVKFEGDTLVNRIELKGIDFKEDGNILGHKLEYNNSHNVYIMAD  
KQKNGIKVNFKIRHNIEDGSVQLADHYQQNTPIGDGPVLLPDNHYLSTQSALS KDPNEKRDH MVLLFEVTAAGITHGM  
DELYK
```

1 B. P. Cormack, R. H. Valdivia and S. Falkow, *Gene*, 1996, **173**, 33.
